# Supplementary material for: AgreementPred: a cheminformatic framework for drug and natural product category recommendation based on multi-representation structural similarity data fusion
Source: Royal Society of Chemistry journal article supplement (doi:10.1039/d5dd00329f), 2025-01-01
Supplement: d5dd00329f1.pdf [file d5dd00329f1.pdf]

### **Supplementary Table Legend**

Supplementary\_Table\_01\_Database\_description

Supplementary\_Table\_02\_Annotated-Compound\_Pubchem

Supplementary\_Table\_03\_Annotated-SE\_Pubchem

Supplementary\_Table\_04\_Annotated-Compound\_Annotations

Supplementary\_Table\_05\_Annotated-Compound\_Annotation\_Relations

Supplementary\_Table\_06\_Annotated-SE\_Annotations

Supplementary\_Table\_07\_Annotation\_Prediction\_analysis

Supplementary\_Table\_08\_Threshold\_0.1\_Predictions

Supplementary\_Table\_09\_Annotated+Threshold\_0.1\_Predictions
